# Supplementary material for: Oligohydramnios affects pulmonary functional/structural abnormalities in school-aged children with bronchopulmonary dysplasia
Source: PubMed Central journal article supplement — Clin Exp Pediatr. 2024 Apr 16;67(5):257–66. doi: 10.3345/cep.2023.01053 (PMC11065638; doi:10.3345/cep.2023.01053), 2024-04-16
Supplement: cep-2023-01053-Supplementary-Fig-1.pdf [file cep-2023-01053-Supplementary-Fig-1.pdf]

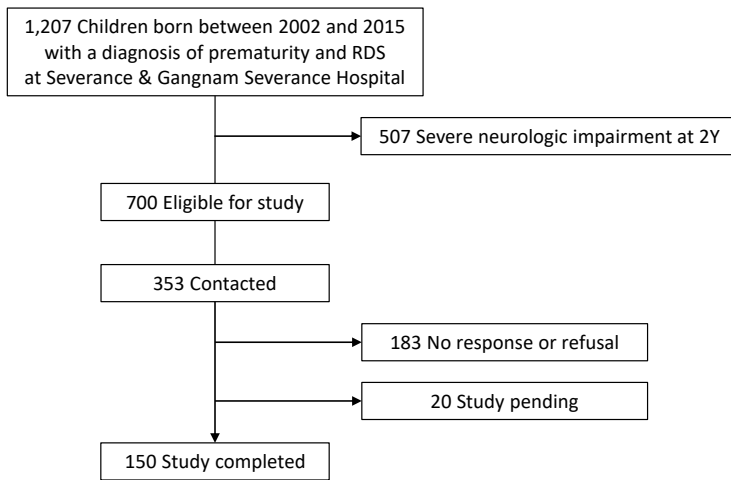

**Supplementary Fig. 1.** Flow diagram of participants in the LONGTERM cohort study. RDS, respiratory distress syndrome.
