# Supplementary material for: Oligohydramnios affects pulmonary functional/structural abnormalities in school-aged children with bronchopulmonary dysplasia
Source: PubMed Central journal article supplement — Clin Exp Pediatr. 2024 Apr 16;67(5):257–66. doi: 10.3345/cep.2023.01053 (PMC11065638; doi:10.3345/cep.2023.01053), 2024-04-16
Supplement: cep-2023-01053-Supplementary-Table-1.pdf [file cep-2023-01053-Supplementary-Table-1.pdf]

**Supplementary Table 1. Clinical characteristics of the participants at the time of the visit**

| Variable                         | BPD group            |                      |                       | P value               |
|----------------------------------|----------------------|----------------------|-----------------------|-----------------------|
|                                  | Non/mild (N=68)      | Moderate (N=39)      | Severe (N=43)         |                       |
| Age (yr)                         | 7.5 (6.5–9.4)        | 7.1 (6.2–8.8)        | 8.1 (6.4–10.3)        | 0.969                 |
| Weight (z score)                 | 0.10 (-0.73 to 0.79) | 0.07 (-0.60 to 1.22) | -0.69 (-1.20 to 0.29) | 0.006 <sup>b,c)</sup> |
| Height (z score)                 | 0.22 (-0.71 to 0.69) | 0.19 (-0.69 to 0.59) | -0.33 (-0.75 to 0.57) | 0.163                 |
| <b>Respiratory morbidities</b>   |                      |                      |                       |                       |
| Significant LRI <sup>a)</sup>    | 40 (58.8)            | 27 (69.2)            | 35 (81.4)             | 0.045 <sup>a)</sup>   |
| Admission                        | 34 (50.0)            | 23 (59.0)            | 32 (74.4)             | 0.039                 |
| ER visit                         | 19 (27.9)            | 7 (17.9)             | 26 (60.5)             | 0.345                 |
| ICU care                         | 1 (1.5)              | 2 (5.1)              | 4 (9.3)               | 0.161                 |
| Wheezing                         | 13 (19.1)            | 8 (20.5)             | 8 (18.6)              | 0.975                 |
| Diagnosis of asthma              | 8 (11.8)             | 9 (23.1)             | 18 (41.9)             | <0.001 <sup>b)</sup>  |
| Asymptomatic                     | 55 (80.9)            | 26 (66.7)            | 27 (62.8)             | 0.513                 |
| <b>Allergic disease</b>          |                      |                      |                       |                       |
| Allergic rhinitis                | 26 (38.2)            | 11 (28.2)            | 5 (11.6)              | 0.010 <sup>b)</sup>   |
| Atopic dermatitis                | 6 (8.8)              | 5 (12.8)             | 3 (7.0)               | 0.649                 |
| Drug allergy                     | 0 (0)                | 1 (2.6)              | 0 (0)                 | 0.239                 |
| Food allergy                     | 3 (4.4)              | 0 (0)                | 2 (4.7)               | 0.402                 |
| Total IgE (kU /L)                | 65.8 (26.3–249.5)    | 90.8 (30.8–234.5)    | 56.5 (24.6–191.0)     | 0.606                 |
| Atopy                            | 24 (39.3)            | 12 (41.4)            | 10 (31.3)             | 0.669                 |
| Eosinophil (cell/ $\mu$ L)       | 139.8 (91.0–270.5)   | 184.9 (112.1–255.5)  | 153.8 (108.3–244.0)   | 0.584                 |
| <b>Family history of allergy</b> |                      |                      |                       |                       |
| Mother                           |                      |                      |                       |                       |
| Asthma                           | 1 (1.5)              | 1 (2.6)              | 2 (4.7)               | 0.598                 |
| Allergic rhinitis                | 14 (20.6)            | 11 (28.2)            | 8 (18.6)              | 0.537                 |
| Atopic dermatitis                | 3 (4.4)              | 1 (2.6)              | 0 (0)                 | 0.372                 |
| Father                           |                      |                      |                       |                       |
| Asthma                           | 3 (4.4)              | 0 (0)                | 2 (4.7)               | 0.402                 |
| Allergic rhinitis                | 14 (20.6)            | 13 (33.3)            | 9 (20.9)              | 0.311                 |
| Atopic dermatitis                | 1 (1.5)              | 1 (2.6)              | 1 (2.3)               | 0.917                 |
| No. of household members         | 3.9 $\pm$ 0.9        | 3.8 $\pm$ 0.8        | 3.9 $\pm$ 0.8         | 0.610                 |
| Monthly income (USD)             | 4,615 (3,077–6,154)  | 4,615 (3,077–4,692)  | 4,615 (2,769–6,154)   | 0.315                 |
| Having pets                      | 9 (13.2)             | 8 (20.5)             | 8 (18.6)              | 0.575                 |
| Passive smoking                  | 26 (38.2)            | 18 (46.2)            | 21 (48.8)             | 0.502                 |
| Smoker - mother                  | 1 (1.5)              | 2 (5.1)              | 0 (0)                 | 0.237                 |
| Smoker - father                  | 25 (36.8)            | 17 (43.6)            | 20 (46.5)             | 0.565                 |

Values are presented as the median (interquartile range) or number (%).

Data related to laboratory studies were collected from 147 of 150 patients; non/mild BPD group, n=68 of 68; moderate BPD group, n=39 of 39; severe BPD group, n=40 of 43.

BPD, bronchopulmonary dysplasia; LRI, lower respiratory tract infection; ER, emergency room; ICU, intensive care unit; IgE, immunoglobulin E; USD, United States dollar.

<sup>a)</sup>Lower respiratory tract infection requiring medication for >1 week or hospital admission. <sup>b)</sup>Non/mild BPD vs. severe BPD. <sup>c)</sup>Moderate BPD vs. severe BPD.
