# Supplementary material for: Oligohydramnios affects pulmonary functional/structural abnormalities in school-aged children with bronchopulmonary dysplasia
Source: PubMed Central journal article supplement — Clin Exp Pediatr. 2024 Apr 16;67(5):257–66. doi: 10.3345/cep.2023.01053 (PMC11065638; doi:10.3345/cep.2023.01053), 2024-04-16
Supplement: cep-2023-01053-Supplementary-Table-2.pdf [file cep-2023-01053-Supplementary-Table-2.pdf]

**Supplementary Table 2. Pulmonary function and chest computed tomography scores according to the presence of respiratory symptoms at the time of visit**

| Variable                                         | Asymptomatic (N=108)  | Symptomatic (N=42)    | P value          |
|--------------------------------------------------|-----------------------|-----------------------|------------------|
| GA (wk)                                          | 28.9 (27.5–30.6)      | 28.2 (26.5–29.9)      | 0.133            |
| Bwt (g)                                          | 1,190 (941–1,510)     | 1,009 (840–1,278)     | <b>0.022</b>     |
| Female sex                                       | 51 (47.2)             | 33 (78.6)             | <b>0.001</b>     |
| SGA                                              | 17 (15.7)             | 4 (9.5)               | 0.324            |
| Twin birth                                       | 47 (43.5)             | 9 (21.4)              | <b>0.012</b>     |
| C-sec                                            | 78 (72.2)             | 32 (76.2)             | 0.622            |
| BPD group                                        |                       |                       |                  |
| Non/mild                                         | 52 (48.1)             | 13 (30.9)             | 0.267            |
| Moderate                                         | 26 (24.1)             | 13 (30.9)             | 0.389            |
| Severe                                           | 30 (27.8)             | 16 (38.2)             | 0.699            |
| <b>Pulmonary function test</b>                   |                       |                       |                  |
| FEV <sub>1</sub> (z score)                       | -0.30 (-3.56–2.93)    | -1.25 (-4.31 to 0.55) | <b>&lt;0.001</b> |
| FEV <sub>1</sub> <LLN                            | 17 (15.7)             | 16 (38)               | <b>0.003</b>     |
| FVC (z score), median (range)                    | 0.34 (-4.07–3.96)     | 0.26 (-5.19 to 3.00)  | 0.182            |
| FVC < LLN                                        | 11 (10.1)             | 8 (19)                | 0.143            |
| FEV <sub>1</sub> /FVC (z score), median (range)  | -1.18 (-3.8 to 1.53)  | -2.39 (-4.66 to 0.65) | <b>&lt;0.001</b> |
| FEV <sub>1</sub> /FVC <LLN                       | 39 (36.1)             | 29 (69)               | <b>&lt;0.001</b> |
| FEF <sub>25%–75%</sub> (z score), median (range) | -0.98 (-3.84 to 1.54) | -2.09 (-5.36 to 0.85) | <b>&lt;0.001</b> |
| FEF <sub>25%–75%</sub> <LLN                      | 32 (29.6)             | 30 (71.4)             | <b>&lt;0.001</b> |
| BDR ≥12%                                         | 17 (15.7)             | 11 (26.2)             | 0.14             |
| CT score median (range)*                         | 2.0 (0–12)            | 6 (0–12)              | <b>&lt;0.001</b> |

Values are presented as median (interquartile range) or number (%) unless otherwise indicated.

GA, gestational age; Bwt, birth weight; SGA, small for gestational age; C-sec, cesarean section; BPD, bronchopulmonary dysplasia; FEV<sub>1</sub>, forced expiratory volume in 1 second; FVC, forced vital capacity; LLN, lower limit of normal; FEF<sub>25%–75%</sub>, forced midexpiratory flow; BDR, bronchodilator response.

Boldface indicates a statistically significant difference with  $P < 0.05$ .
