# Supplementary material for: Oligohydramnios affects pulmonary functional/structural abnormalities in school-aged children with bronchopulmonary dysplasia
Source: PubMed Central journal article supplement — Clin Exp Pediatr. 2024 Apr 16;67(5):257–66. doi: 10.3345/cep.2023.01053 (PMC11065638; doi:10.3345/cep.2023.01053), 2024-04-16
Supplement: cep-2023-01053-Supplementary-Table-3.pdf [file cep-2023-01053-Supplementary-Table-3.pdf]

**Supplementary Table 3. Pulmonary function test results according to BPD severity**

| Pulmonary function test          | Non/mild BPD (N=68)   | Moderate BPD (N=39)   | Severe BPD (N=43)     | P value                      |
|----------------------------------|-----------------------|-----------------------|-----------------------|------------------------------|
| FEV <sub>1</sub> (%pred)         | 97.7 (62.9–130)       | 95.1 (64.5–117.2)     | 92.2 (53.4–107.4)     | 0.121                        |
| FEV <sub>1</sub> (z score)       | -0.18 (-3.41 to 2.93) | -0.69 (-3.56 to 0.89) | -1.24 (-4.31 to 0.38) | <b>0.025</b> <sup>a,b)</sup> |
| FVC (%pred)                      | 100.6 (73–129.5)      | 99.3 (69.3–115.1)     | 95.0 (59.5–121.9)     | <b>0.018</b> <sup>a)</sup>   |
| FVC (z score)                    | 0.41 (-2.86–3.96)     | 0.62 (-4.07–2.31)     | -0.22 (-5.19 to 2.90) | <b>0.007</b> <sup>a,b)</sup> |
| FEV <sub>1</sub> /FVC            | 84.3 (55.3–95.6)      | 81.9 (64.3–93.7)      | 79.5 (58.0–95.3)      | <b>0.026</b> <sup>a)</sup>   |
| FEV <sub>1</sub> /FVC (%pred)    | 98.5 (65.5–112.6)     | 96.7 (75.0–106.8)     | 92.3 (67.6–113.1)     | 0.084                        |
| FEV <sub>1</sub> /FVC (z score)  | -1.12 (-4.66 to 1.32) | -1.52 (-3.50 to 0.95) | -1.80 (-4.01 to 1.53) | <b>0.006</b> <sup>a)</sup>   |
| FEF <sub>25%–75%</sub> (%pred)   | 65.9 (20.0–115.2)     | 68.7 (31.2–117.7)     | 64.3 (21.1–106.2)     | 0.656                        |
| FEF <sub>25%–75%</sub> (z score) | -1.00 (-5.36 to 1.54) | -1.36 (-3.34 to 0.84) | -1.88 (-5.14 to 0.74) | <b>0.011</b> <sup>a)</sup>   |
| BDR ≥ 2%                         | 13 (19.1)             | 8 (20.5)              | 7 (16.3)              | 0.879                        |

Values are presented as the median (range) or number (%).

BPD, bronchopulmonary dysplasia; FEV<sub>1</sub>, forced expiratory volume in 1 second; FVC, forced vital capacity; FEF<sub>25%–75%</sub>, forced midexpiratory flow.

<sup>a)</sup>*P*<0.05, severe BPD vs. non/mild BPD. <sup>b)</sup>*P*<0.05, Moderate BPD vs. non/mild BPD.

Boldface indicates a statistically significant difference with *P*<0.05.
